# Supplementary material for: Ultrasensitive photoluminescence modification of the Eu3+ ion based on light tuning of the surface potential of the Bi3O4Cl layered semiconductor and application in facile UV light detectors
Source: Royal Society of Chemistry journal article supplement (doi:10.1039/d1tc05821e), 2022-01-01
Supplement: d1tc05821e1.pdf [file d1tc05821e1.pdf]

## Electronic supplementary information (ESI†)

### **Ultra-sensitive photoluminescence modification of Eu<sup>3+</sup> ion based on light tuning surface potential of Bi<sub>3</sub>O<sub>4</sub>Cl layered semiconductor and application for facile UV light detector**

Rui Hu, Yongjin Li\*, Zhaoyi Yin, Tianhui Wang, Jianbei Qiu\*, Zhengwen Yang, and Zhiguo Song\*

*School of Materials Science and Engineering, Kunming University of Science and Technology, Kunming, 650093, PR China*

*\*Corresponding Author:*

*E-mail: liyongjin@kust.edu.cn (Y. Li).*

*qiu@kust.edu.cn (J. Qiu).*

*songzg@kust.edu.cn (Z. Song).*

**Table S1.** Rietveld Refinement and Lattice Parameters of Bi<sub>3</sub>O<sub>4</sub>Cl and Bi<sub>3</sub>O<sub>4</sub>Cl:5%Eu<sup>3+</sup>

|                            | Bi <sub>3</sub> O <sub>4</sub> Cl                  | Bi <sub>3</sub> O <sub>4</sub> Cl:5%Eu <sup>3+</sup> |
|----------------------------|----------------------------------------------------|------------------------------------------------------|
| space group                | <i>I</i> <sub>2</sub> / <i>a</i> <sup>1</sup> (15) | <i>I</i> <sub>2</sub> / <i>a</i> <sup>1</sup> (15)   |
| <i>a</i> (Å)               | 5.695                                              | 5.683                                                |
| <i>b</i> (Å)               | 5.648                                              | 5.636                                                |
| <i>c</i> (Å)               | 18.573                                             | 18.541                                               |
| $\beta$ (deg)              | 91.52                                              | 91.35                                                |
| Z                          | 4                                                  | 4                                                    |
| <i>V</i> (Å <sup>3</sup> ) | 597.20                                             | 593.75                                               |

According to the Rietveld refined results, the as-prepared Bi<sub>3</sub>O<sub>4</sub>Cl:Eu<sup>3+</sup> phosphor is assigned to the monoclinic system and belongs to the *I*<sub>2</sub>/*a*<sup>1</sup>(15) space group. The lattice parameters are confirmed as *a* = 5.683 Å, *b* = 5.636 Å, *c* = 18.541 Å,  $\beta$  = 91.52°, *Z* = 4, and *V* = 593.75 Å<sup>3</sup>.<sup>1,2</sup> Compared with the standard cell parameters and cell volume that derive from PDF#86-2221, all values of Bi<sub>3</sub>O<sub>4</sub>Cl:Eu<sup>3+</sup> sample show a significant shrinkage, proving the vast substitution of Eu<sup>3+</sup> ions (1.066 Å, CN = 8) for the bigger Bi<sup>3+</sup> sites (1.17 Å, CN = 8).

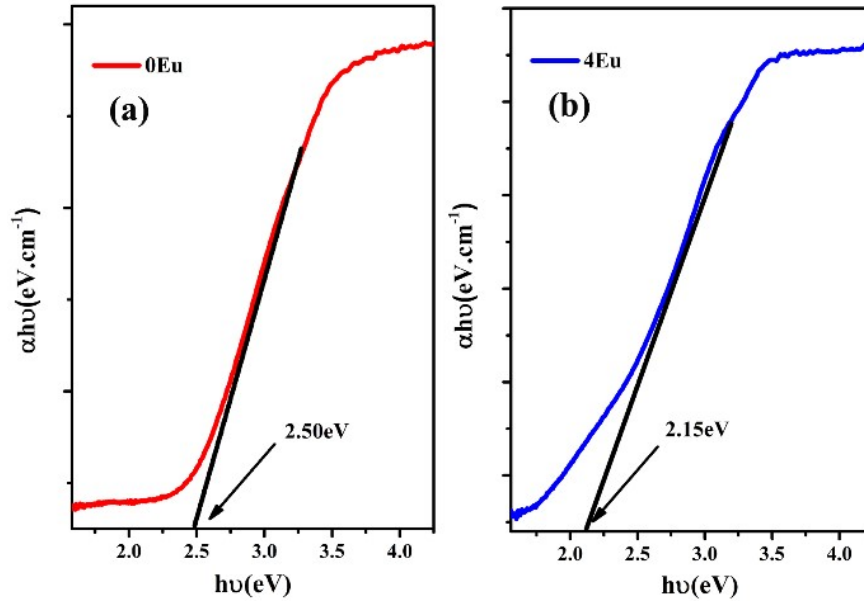

**Fig. S1.** Plots of  $(\alpha hv)^{1/2}$  vs. the photon energy ( $h\nu$ ) for the as-synthesized undoped  $\text{Bi}_3\text{O}_4\text{Cl}$  sample (a) and the  $\text{Bi}_3\text{O}_4\text{Cl}:4\%\text{Eu}^{3+}$  sample (b).

As showed in **Fig. S1a-b**, the absorption edge of  $\text{Eu}^{3+}$  doped  $\text{Bi}_3\text{O}_4\text{Cl}$  sample slightly redshifts compared with that of undoped one (for simplifying, just represented the representative curves of sample with 0 and 4 mol%  $\text{Eu}^{3+}$ ). It indicates that  $\text{Eu}^{3+}$  ion dopant forming impurity energy levels decreases the forbidden gap of  $\text{Bi}_3\text{O}_4\text{Cl}$ , and the calculation of energy band structure is being done by our group.<sup>2</sup>

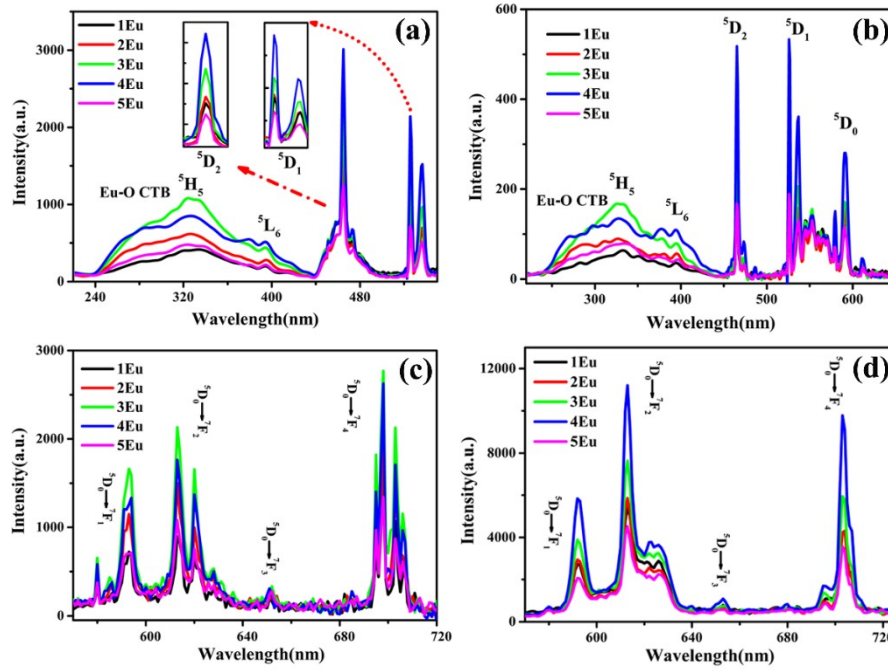

**Fig. S2.** (a)-(b) Excitation spectra of  $\text{Bi}_3\text{O}_4\text{Cl}:x\text{Eu}^{3+}$  ( $x = 1, 2, 3, 4,$  and  $5$  mol%) microrystals recorded at  $\lambda_{\text{Em}} = 613$  nm and  $704$  nm; (c)-(d) Emission spectra of the same samples upon  $320$  nm and  $465$  nm excitation. The insets are the enlarged excitation spectra in  ${}^7\text{F}_0 \rightarrow {}^5\text{D}_2$  and  ${}^7\text{F}_0 \rightarrow {}^5\text{D}_1$  transition region, and other excitation bands followed the similar tendency but without presentation for simplifying.

**Fig. S2** presents the excitation spectra (a-b) and emission spectra (c-d) of prepared  $\text{Eu}^{3+}$  doped  $\text{Bi}_3\text{O}_4\text{Cl}$  samples with different concentration of  $\text{Eu}^{3+}$  ions. It shows that whether under absorption-edge ( $394$  and  $465$  nm) or intraband ( $526$  nm) excitation, the concentration dependence of the emission intensity of  $\text{Eu}^{3+}$  ion are totally same, except that under deep-UV excitation ( $320$  nm) (Figure S3c-d). This indicates that the photoexcited electrons from broadband excitation may be excited via intermediate electron-hole pair states of semiconductor.

As for the decay times of  $\text{Eu}^{3+}$ -related emission for  $\text{Bi}_3\text{O}_4\text{Cl}:4\%\text{Eu}^{3+}$  sample, all decay profiles keep following the single exponential decay equation:  $I = A\exp(-t/\tau)$ ,<sup>3,4</sup> where parameters  $A$ ,  $I$ , and  $t$  are represent the constant, luminescent intensity, and the decay time,

respectively. Therefore, under 465 nm excitation, the lifetimes of sample were calculated to 1.00 ms ( $\lambda_{Em} = 613$  nm), 0.92 ms ( $\lambda_{Em} = 620$  nm), 0.91 ms ( $\lambda_{Em} = 698$  nm), and 0.99 ms ( $\lambda_{Em} = 704$  nm), respectively. Meanwhile, under 320 nm irradiation, the obtained results are 1.24 ms ( $\lambda_{Em} = 613$  nm), 1.17 ms ( $\lambda_{Em} = 620$  nm), 1.15 ms ( $\lambda_{Em} = 698$  nm), and 1.17 ms ( $\lambda_{Em} = 704$  nm), respectively.

## Reference

- [1] R. D. Shannon, *Acta Crystallographica*. **1976**, *A32*, 751.
- [2] X. P. Lin, T. Huang, F. Q. Huang, W. D. Wang, J. L. Shi, *J. Phys. Chem. B* **2006**, *110*, 24629.
- [3] P. Du, J. S. Yu, *Chem. Eng. J.* **2017**, *327*, 109.
- [4] J. Zhou, Z. G. Xia, *J. Mater. Chem. C* **2014**, *2*, 6978.
